# Supplementary material for: Pre-sleep Cognitive Arousal Decreases Following a 4-Week Introductory Mindfulness Course
Source: Springer Nature journal article supplement (doi:10.1007/s12671-019-01217-4), 2019-08-20
Supplement: MOESM2 [file 17086800]

**Pre-sleep cognitive arousal decreases following a four-week introductory mindfulness course**

Zuriel Hassirim, Eric Lim, June Lo Ph.D., Julian Lim, Ph.D.

**Supplemental analysis**

In addition to the intent-to-treat (ITT) analysis performed on the full sample of participants (N = 96), we also conducted completer analysis, drooping the 5 participants who did not complete the Mindfulness Foundation Course. As with the ITT analysis, we used repeated-measures ANCOVA with group as a between-subjects variables, and age, gender, and years of education as covariates. The primary results were as follows:

**Five-Facet Mindfulness Questionnaire**

We found significant interactions in four out of the five subscales, and all of these were in favour of the treatment group.

- Observing: F1,85 = 4.20, p = .044, partial ηp2 = .047
- Describing: F1,85 = 3.81, p = .054
- Acting with awareness: F1,85 = 5.05, p = .03, partial ηp2 = .056
- Non-judging: F1,85 = 9.04, p = .003, partial ηp2 = .096
- Non-reactivity: F1,85 = 5.50, p = .02, partial ηp2 = .061

**Pittsburgh Sleep Quality Inventory (PSQI)**

No significant interaction was observed (F1,86 = 0.84, p = 36). Significant reductions in PSQI scores were observed over time in both groups (treatment: t56 = 3.82, p < .001; waitlist: t38 = 2.93, p = .006).

**Pre-Sleep Arousal Scale**

- Somatic subscale: we observed a trend-level interaction between time and group (F1,72 = 3.49, p = .066).
- Cognitive subscale: we observed a significant interaction (F1,72 = 7.16, p = .009, partial ηp2 = .090), with decreases in cognitive arousal in the treatment group, and slight increases in the waitlist group. Post-hoc tests showed a significant decreases in the treatment (t48 = 3.11, p = .003) but not the control group (t27 = -0.46, p = .65).

**Actigraphy**

No significant time x group interactions were found for the three variables analyzed

- Sleep efficiency: F1,73 = 0.018, p = .89
- Sleep onset latency: F1,74 = 0.83, p = .36
- Wake after sleep onset: F1,74 = 3.09, p = .08
